# Supplementary material
Source: PubMed Central journal article supplement (PMC5164936)
Supplement: NIHMS70266-supplement-Supplementary_information.pdf [file NIHMS70266-supplement-Supplementary_information.pdf]

Figure 1 b

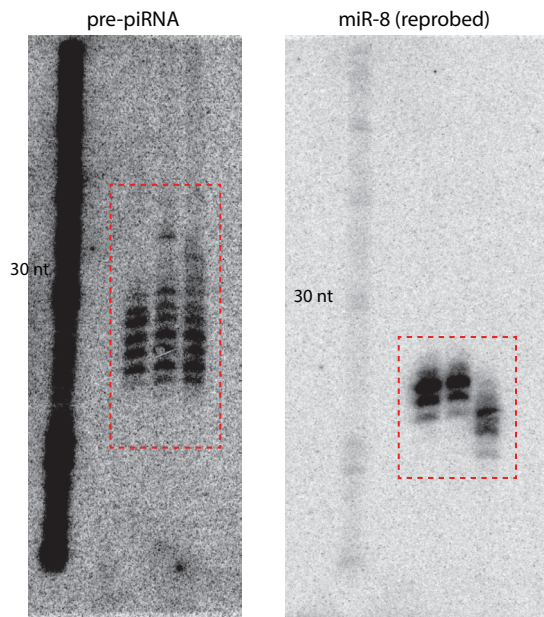

Figure 2 a

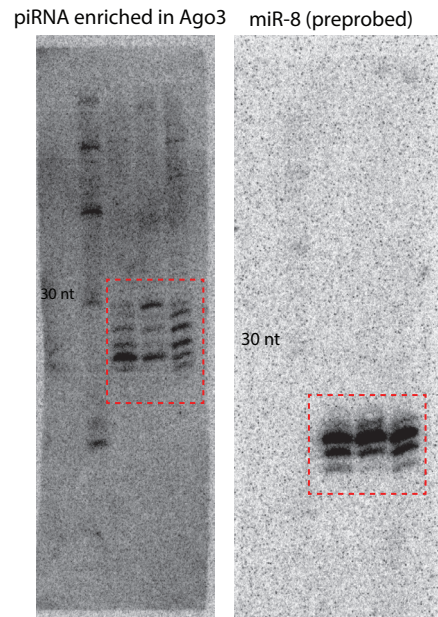

Figure 2 b

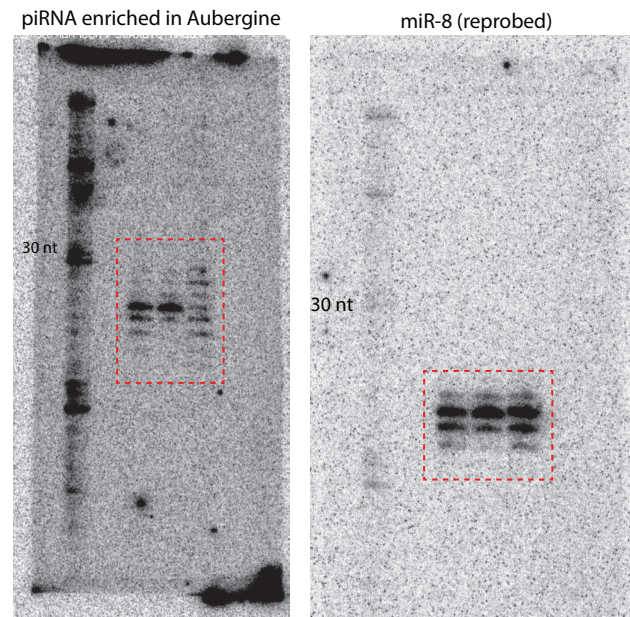

Figure 4 f

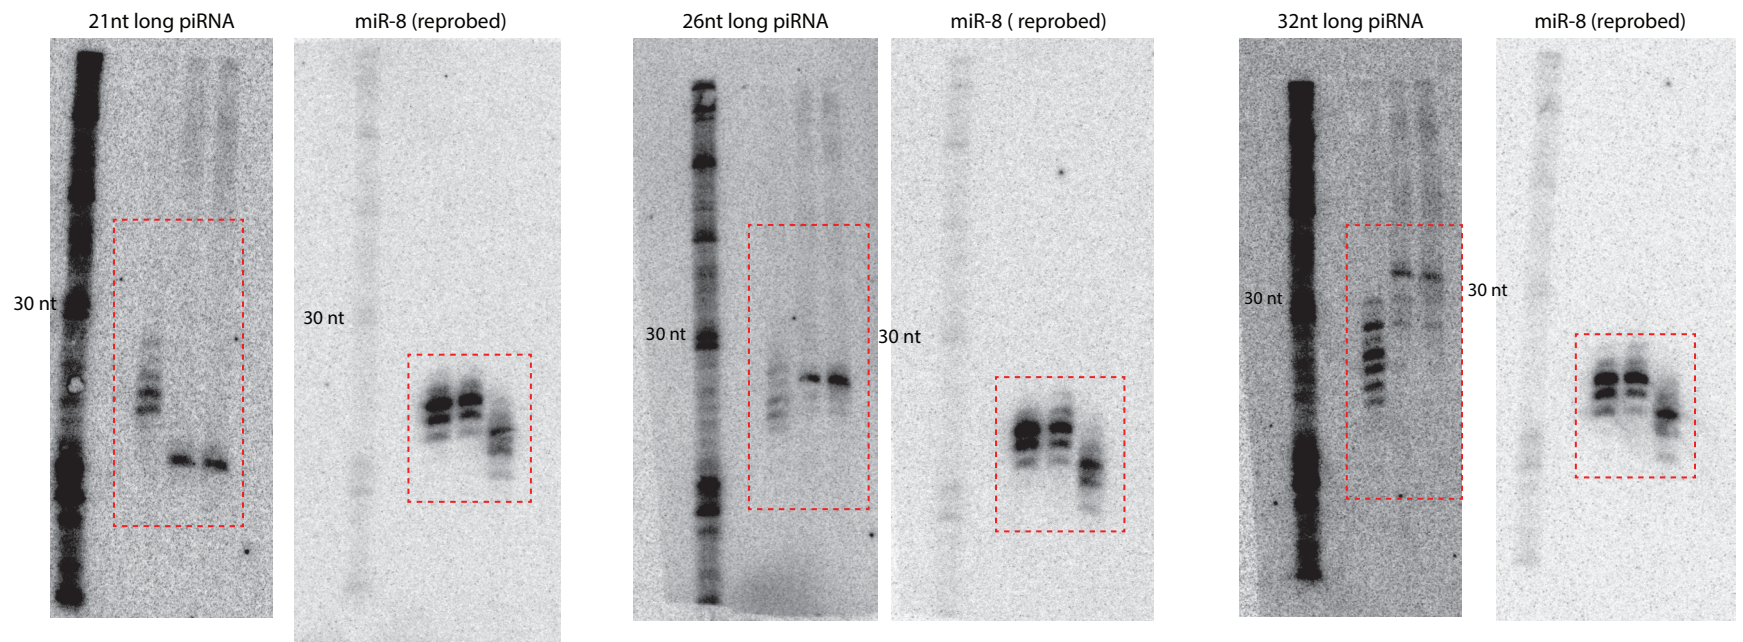



Figure ED2i, j

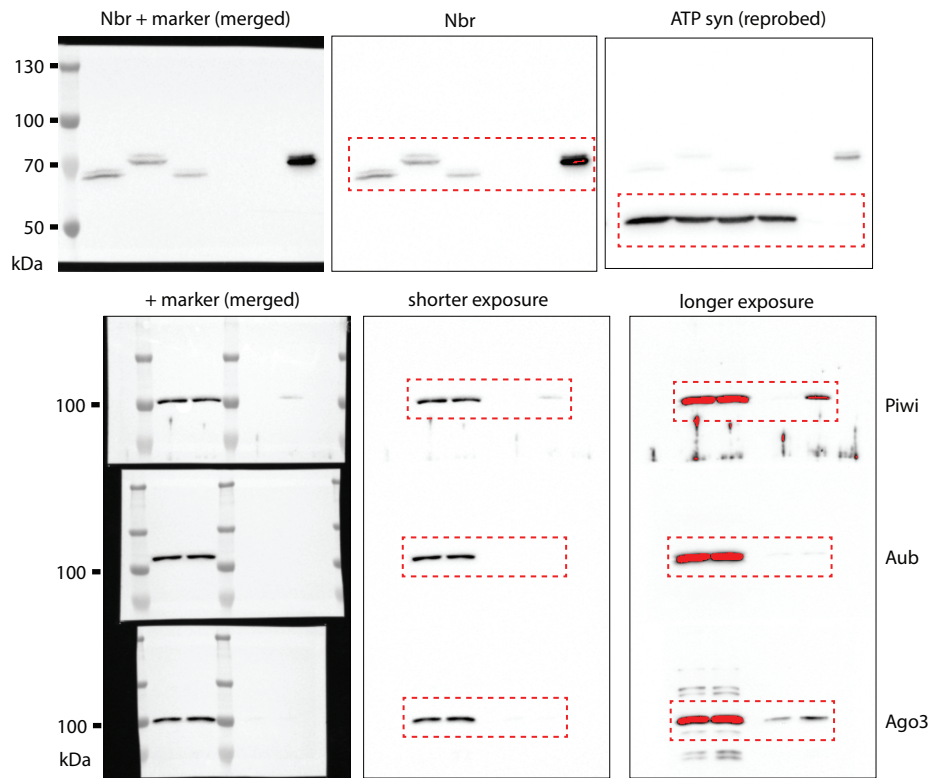

Figure ED3d

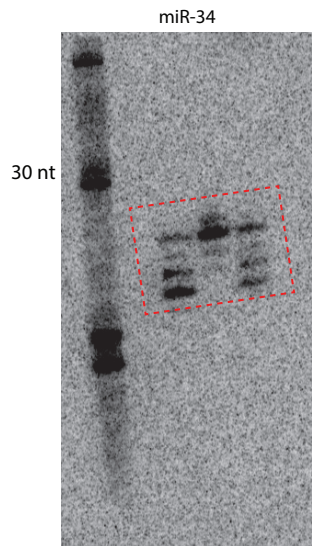

Figure ED3f

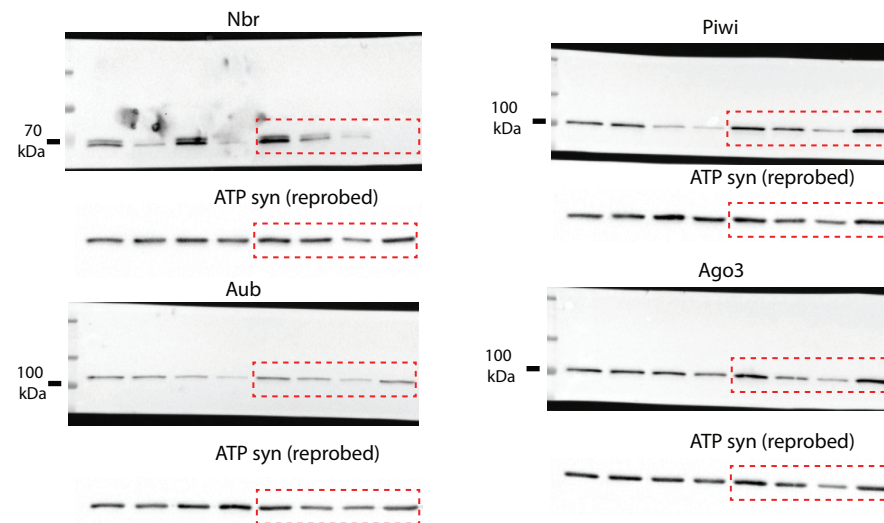

## Supplementary Table of high throughput datasets analyzed in this study

| Sample name                                        | title                                                                                                                                                   | used in the following figure panels                                               | GEO Accession |
|----------------------------------------------------|---------------------------------------------------------------------------------------------------------------------------------------------------------|-----------------------------------------------------------------------------------|---------------|
| <b>libraries sequenced in this study</b>           |                                                                                                                                                         |                                                                                   |               |
| w1118_total_no_2S_rRNA_depletion                   | small RNAs (18-29nt) from w1118 ovaries without 2S rRNA depletion                                                                                       | Fig. ED4                                                                          | GSE83698      |
| w1118_total                                        | small RNAs (18-40nt) from w1118 ovaries with 2S rRNA depletion                                                                                          | Fig. 2a, 2b, 3c, ED6c, ED4d, ED4e, ED4, ED4i, ED7b                                | GSE83698      |
| w1118_PiwiIP                                       | Piwi bound small RNAs (18-40nt) from w1118 ovaries                                                                                                      | Fig. 1e, 2c, 3b, 3c, ED6c, ED3j, ED5a, ED5b, ED6a                                 | GSE83698      |
| w1118_AubIP                                        | Aub bound small RNAs (18-40nt) from w1118 ovaries                                                                                                       | Fig. 1e, 2c, 2d, 2e, 3b, 3c, ED6c, ED5a, ED5b, ED5c, ED6a                         | GSE83698      |
| w1118_Ago3IP                                       | Ago3 bound small RNAs (18-40nt) from w1118 ovaries                                                                                                      | Fig. 1e, 2c, 2d, 2e, 3b, 3c, ED6c, ED5a, ED5b, ED5c, ED6a                         | GSE83698      |
| Nibbler_KO_total                                   | small RNAs (18-40nt) from Nibbler knock-out ovaries with 2S rRNA depletion                                                                              | Fig. 2a, 2b, 3c, ED6c, ED4d, ED4i, ED4e, ED7b                                     | GSE83698      |
| Nibbler_KO_PiwiIP                                  | Piwi bound small RNAs (18-40nt) from Nibbler -/- ovaries                                                                                                | Fig. 1e, 2c, 3b, 3c, ED6c, ED3j, ED5a, ED5b, ED6a                                 | GSE83698      |
| Nibbler_KO_AubIP                                   | Aub bound small RNAs (18-40nt) from Nibbler -/- ovaries                                                                                                 | Fig. 1e, 2c, 2d, 2e, 3b, 3c, ED6c, ED5a, ED5b, ED5c, ED6a                         | GSE83698      |
| Nibbler_KO_Ago3IP                                  | Ago3 bound small RNAs (18-40nt) from Nibbler -/- ovaries                                                                                                | Fig. 1e, 2c, 2d, 2e, 3b, 3c, ED6c, ED5a, ED5b, ED5c, ED6a                         | GSE83698      |
| Papi_KO_PiwiIP                                     | Piwi bound small RNAs (18-40nt) from Papi -/- ovaries                                                                                                   | Fig. 1e, ED3j                                                                     | GSE83698      |
| Papi_KO_AubIP                                      | Aub bound small RNAs (18-40nt) from Papi -/- ovaries                                                                                                    | Fig. 1e                                                                           | GSE83698      |
| Papi_KO_Ago3IP                                     | Ago3 bound small RNAs (18-40nt) from Papi -/- ovaries                                                                                                   | Fig. 1e                                                                           | GSE83698      |
| Zuc_depletion_AubIP                                | Aub bound small RNAs (18-40nt) from Zucchini depleted ovaries                                                                                           | Fig. 1b                                                                           | GSE83698      |
| Zuc_Nbr_depletion_AubIP                            | Aub bound small RNAs (18-50nt) from Zucchini and Nibbler depleted ovaries                                                                               | Fig. ED8b, ED9b                                                                   | GSE83698      |
| Zuc_Nbr_depletion_Ago3IP                           | Ago3 bound small RNAs (18-50nt) from Zucchini and Nibbler depleted ovaries                                                                              | Fig. ED8b, ED9b                                                                   | GSE83698      |
| Biogenesis_repoter_1_two_sites+Zuc_depletion       | small RNAs (18-40nt) from flies containing piRNA biogenesis repoter_1 with two target sites with Zucchini depletion and 2S rRNA depletion               | Fig. 1d, ED7a, ED8b                                                               | GSE83698      |
| Biogenesis_repoter_1_two_sites+Zuc_Papi_depletion  | small RNAs (18-40nt) from flies containing piRNA biogenesis repoter_1 with two target sites with Zucchini and Papi depletion and 2S rRNA depletion      | Fig. 1d                                                                           | GSE83698      |
| Biogenesis_repoter_1_two_sites+Zuc_Nbr_depletion   | small RNAs (18-40nt) from flies containing piRNA biogenesis repoter_1 with two target sites with Zucchini and Nibbler depletion and 2S rRNA depletion   | Fig. 1d, ED7a, ED8b                                                               | GSE83698      |
| Biogenesis_repoter_2_two_sites+Zuc_depletion       | small RNAs (18-40nt) from flies containing piRNA biogenesis repoter_2 with two target sites with Zucchini depletion and 2S rRNA depletion               | Fig. ED7a, ED2f, ED8b                                                             | GSE83698      |
| Biogenesis_repoter_2_two_sites+Zuc_Papi_depletion  | small RNAs (18-40nt) from flies containing piRNA biogenesis repoter_2 with two target sites with Zucchini and Papi depletion and 2S rRNA depletion      | Fig. ED2f, ED3d, ED2g                                                             | GSE83698      |
| Biogenesis_repoter_2_two_sites+Zuc_Nbr_depletion   | small RNAs (18-40nt) from flies containing piRNA biogenesis repoter_2 with two target sites with Zucchini and Nibbler depletion and 2S rRNA depletion   | Fig. ED7a, 4b, ED2f, ED8b                                                         | GSE83698      |
| Biogenesis_repoter_2_three_sites+Zuc_Nbr_depletion | small RNAs (18-40nt) from flies containing piRNA biogenesis repoter_2 with three target sites with Zucchini and Nibbler depletion and 2S rRNA depletion | Fig. ED7a, 4b, ED8b                                                               | GSE83698      |
| Zuc_Nbr_depletion_rep1                             | small RNAs (18-40nt) from Zucchini and Nibbler depleted ovaries with 2S rRNA depletion                                                                  | Fig. ED7a, 4a, 4c, 4d, ED8a, ED8b, ED8c, ED9a, ED10a                              | GSE83698      |
| Zuc_Nbr_depletion_rep2                             | small RNAs (18-40nt) from Zucchini and Nibbler depleted ovaries with 2S rRNA depletion                                                                  | Fig. ED7a, ED8b                                                                   | GSE83698      |
| Zuc_Nbr_depletion_rep3                             | small RNAs (18-40nt) from Zucchini and Nibbler depleted ovaries with 2S rRNA depletion                                                                  | Fig. ED7a, ED8b                                                                   | GSE83698      |
| Zuc_depletion_rep1                                 | small RNAs (18-40nt) from Zucchini and depleted ovaries with 2S rRNA depletion                                                                          | Fig. 1b, 2a, 2b, ED7a, 4a, 4c, 4e, ED1a, ED1b, ED2g, ED3d, ED8a, ED8b, ED8c, ED9a | GSE83698      |
| Zuc_depletion_rep2                                 | small RNAs (18-40nt) from Zucchini and depleted ovaries with 2S rRNA depletion                                                                          | Fig. ED7a, ED8b                                                                   | GSE83698      |
| Zuc_depletion_rep3                                 | small RNAs (18-40nt) from Zucchini and depleted ovaries with 2S rRNA depletion                                                                          | Fig. ED7a, ED8b                                                                   | GSE83698      |
| Zuc_depletion_rep4                                 | small RNAs (18-40nt) from Zucchini and depleted ovaries with 2S rRNA depletion                                                                          | Fig. ED7a, ED8b                                                                   | GSE83698      |
| Zuc_Nbr_depletion_oxidized                         | small RNAs (18-40nt) from Zucchini and Nibbler depleted ovaries with 2S rRNA depletion and oxidation                                                    | Fig. ED10b                                                                        | GSE83698      |
| w1118_polyA_plus_RNAseq                            | polyA selected RNAs from w1118 ovaries                                                                                                                  | Fig. ED3g                                                                         | GSE83698      |
| nibbler_null_polyA_plus_RNAseq                     | polyA selected RNAs from Nibbler -/- ovaries                                                                                                            | Fig. ED3g                                                                         | GSE83698      |
| control_depletion_polyA_plus_RNAseq                | polyA selected RNAs from control depletion ovaries                                                                                                      | Fig. ED7d                                                                         | GSE83698      |
| zucchini_depletion_polyA_plus_RNAseq               | polyA selected RNAs from Zucchini depleted ovaries                                                                                                      | Fig. ED7d                                                                         | GSE83698      |
| zucchini_and_nibbler_depletion_polyA_plus_RNAseq   | polyA selected RNAs from Zucchini and Nibbler depleted ovaries                                                                                          | Fig. ED7d                                                                         | GSE83698      |
| <b>libraries sequenced previously</b>              |                                                                                                                                                         |                                                                                   |               |
| Wsh_total                                          | small RNAs (18-29nt) from control depletion ovaries                                                                                                     | Fig. ED6d, ED1a, ED1b                                                             | GSE55824      |
| Wsh_PiwiIP                                         | Piwi bound small RNAs (18-40nt) from control depleted ovaries                                                                                           | Fig. ED1a                                                                         | GSE64802      |
| Wsh_AubIP                                          | Aub bound small RNAs (18-40nt) from control depleted ovaries                                                                                            | Fig. ED1a                                                                         | GSE64802      |
| Wsh_Ago3IP                                         | Ago3 bound small RNAs (18-40nt) from control depleted ovaries                                                                                           | Fig. ED1a                                                                         | GSE64802      |
| ZUCsh_PiwiIP                                       | Piwi bound small RNAs (18-40nt) from Zucchini depleted ovaries                                                                                          | Fig. ED1a, ED5a                                                                   | GSE64802      |
| ZUCsh_Aub3IP                                       | Aub bound small RNAs (18-40nt) from Zucchini depleted ovaries                                                                                           | Fig. 2c, 2d, 2e, ED8b, ED1a, ED5a, ED5b, ED5c, ED9b                               | GSE64802      |
| ZUCsh_Ago3IP                                       | Ago3 bound small RNAs (18-40nt) from Zucchini depleted ovaries                                                                                          | Fig. 2c, 2d, 2e, ED8b, ED1a, ED5a, ED5b, ED5c, ED9b                               | GSE64802      |
